1 **TITLE PAGE**

2 **Next-generation ultrasonic recorders facilitate effective bat**

3 **activity and distribution monitoring by citizen scientists**

4 Piia Lundberg<sup>1</sup>, Melissa B. Meierhofer<sup>1</sup>, Ville Vasko<sup>1</sup>, Miina Suutari<sup>1</sup>, Ann Ojala<sup>2</sup>, Annukka

5 Vainio<sup>3</sup> and Thomas M. Lilley<sup>\*1</sup>

6 <sup>1</sup> BatLabFinland, Zoology Unit, Finnish Museum of Natural History, University of Helsinki,  
7 Finland

8 <sup>2</sup> Natural Resources Institute Finland (Luke), Finland

9 <sup>3</sup> Helsinki Institute of Sustainability Science, Faculty of Agriculture and Forestry, University  
10 of Helsinki, Finland

11 (\*) corresponding author: Thomas M. Lilley, BatLabFinland, Zoology Unit, Finnish Museum  
12 of Natural History, University of Helsinki, Finland

13

14 Open Research Statement: Data are not yet provided, but will uploaded Dryad upon

15 publication.

16

17 **ABSTRACT**

18 Time and budgetary resources are often a limiting factor in the collection of large-scale  
19 ecological data. If data collected by citizen scientists were comparable to data collected by  
20 researchers, it would allow for more efficient data collection over a broad geographic area.  
21 Here, we compare the quality of data on bat activity collected by citizens (high school  
22 students and teachers) and researchers. Both researchers and citizen scientists used the same  
23 comprehensive instructions when choosing study sites. We found no differences in total bat  
24 activity minutes recorded by citizens and researchers. Instead, citizen scientists collected data  
25 from a wider variety of habitats than researchers. Involvement of citizens also increased the  
26 geographical coverage of data collection, resulting in the northernmost documentation of the  
27 *Nathusius's pipistrelle* so far in Finland. Therefore, bat research can benefit from the use of  
28 citizen science when participants are given precise instructions and calibrated data collection  
29 equipment. Citizen science projects also have other far-reaching benefits, increasing, for  
30 example, the scientific literacy and interest in natural sciences of citizens. Involving citizens  
31 in science projects also has the potential to enhance their willingness to conserve nature.

32

33 **KEYWORDS:** citizen science, bats, acoustic monitoring, environmental education, data  
34 collection, environmental change

35

## 36 INTRODUCTION

37 The increase in human-mediated processes such as climate change and habitat loss, have  
38 inflicted incredible pressure on the Earth's biodiversity (Bellard et al. 2012). Worst case  
39 models predict that we are entering the sixth mass extinction through accelerated modern  
40 human-induced species losses (Ceballos et al. 2015), highlighting the need for large-scale  
41 monitoring to be initiated rapidly to gain an understanding of the impacts global change has  
42 on the biota. Despite recent advances in technology facilitating such monitoring, human  
43 resources are often a limiting factor, hindering the effective collection of large-scale spatio-  
44 temporal datasets.

45 Bats (order Chiroptera) are able to respond to different types of disturbance because of their  
46 unique ability amongst mammals: powered flight. Some species of bats, such as *Pipistrellus*  
47 *kuhlii*, have benefited from disturbances such as climate change, with an estimated range  
48 expansion of just under 400% within the last four decades (Ancillotto et al. 2016). However,  
49 populations of many species are being negatively affected by anthropogenic change in some  
50 parts or across their entire distribution range (Frick et al. 2010, Gaultier et al. 2020, Rydell et  
51 al. 2020). Consequently, growing interests lie with acquiring reliable data for the  
52 conservation and management of bats due to their importance to biodiversity, as well as their  
53 ecological and economical importance (Boyles et al. 2011, Kasso and Balakrishnan 2013).

54 Although monitoring methods have provided valuable information on population sizes and  
55 trends of bats over the last decades (Flaquer et al. 2007, Roche et al. 2011), these efforts have  
56 relied on manual operation of ultrasound detectors and real-time identification of bat species  
57 present. Fortunately, bat research has taken great strides forward in the last decade with the  
58 development of ultrasonic recorders and associated automated identification software (Hill et  
59 al. 2018). The use of relatively low-cost units permits the initiation of large-scale monitoring

60 efforts producing vast amounts of data. However, researchers are still required to travel  
61 extensively for maintenance and retrieval of the units, increasing project costs.

62 Here, citizen science, which is a practice of engaging the public in a scientific project  
63 (McKinley et al. 2017), can assist researchers by providing spatio-temporal coverage to  
64 facilitate data collection (Devictor et al. 2010). Our project relies on the Heigl et al. (2019)  
65 description of the citizen science project, according to which the project is carried out in  
66 collaboration with citizens and researchers, it adheres to scientific standards and ethics, and  
67 relies on the flow of information between people involved in the project and transparency,  
68 including open access to data and results. Our citizen science project produces  
69 presence/absence data, which is often the case when data collection is structured and takes  
70 place under the control of researchers (Welvaert and Caley 2016). Although the quality of  
71 data collected by volunteers has come under criticism (Conrad and Hilchey 2011, Steger et  
72 al. 2017), several recent publications have shown that unpaid volunteers can produce datasets  
73 for diverse types of citizen-science projects at an accuracy that can even surpass that of  
74 professionals (Galloway et al. 2006, Kosmala et al. 2016, Brown and Williams 2019).

75 With the recent technological advances in automated bat recorders and species identification,  
76 the emphasis shifts towards the selection of the study site for detection of the presence or  
77 absence of given species of bats. In this study, we combined the efforts of citizen scientists  
78 and researchers to monitor the spatio-temporal distribution of two focal species: the Northern  
79 bat (*Eptesicus nilssonii*) and the Nathusius's pipistrelle (*Pipistrellus nathusii*). We compared  
80 study site selection and total recorded bat activity between experienced bat researchers and  
81 citizens. Both species are distinguishable from all other bat species using automated  
82 identification software with manual confirmation. Whereas the Northern bat is still rather  
83 common in Finland, the Nathusius's pipistrelle is poorly documented in Finland (Ijäs et al.  
84 2017, Tidenberg et al. 2019, Blomberg et al. 2020). We hypothesised that given the

85 equipment and precise instructions on how to select a study site, citizen scientists would be  
86 able to collect a comparable amount of bat activity minutes of each species as researchers.

## 87 MATERIAL AND METHODS

### 88 Research project participants

89 We reached out to the participants for our citizen science project by publishing an article  
90 about the project in *Natura*, a magazine published by the biology and geography teachers'  
91 association, and by contacting the high schools directly. The biology and geography teachers  
92 enrolled their students in the project and also acted as a liaison between the school group and  
93 the researchers. The project involved students and teachers from a total of 18 schools across  
94 Finland, from Helsinki in the South to the Oulu region approximately 600km to the North. A  
95 total of 100 students (age 16-17) as well as some of the teachers participated. The number of  
96 participants from different schools varied from a single student to the entire class. From here  
97 on, we will collectively call the high school students and the participating teachers 'citizen  
98 scientists' for the sake of clarity. In addition to citizen scientists, three researchers collected  
99 data independently.

### 100 Data collection

101 Prior to the start of the data collection, we sent the teachers the materials for two introductory  
102 lectures targeted at citizen scientists, the first on the ecology of bats and the second on how to  
103 collect data, including information on what habitat types should be selected as study sites. In  
104 addition, detailed instructions were available on our project website throughout the data  
105 collection period. We also reminded the citizen scientists about the data collection before  
106 each device deployment on the project's Instagram account (see Online Appendix for an  
107 example). All of this was done to standardize data collection across all participants of this

108 project. The researchers were also available throughout the data collection period for possible  
109 additional instructions and to solve problem situations.

110 We allowed the citizen scientists at each school to collect data alone or in small groups, due  
111 to variation in group size and preferences between schools. The most common method was to  
112 work in small groups. Once the class was divided into small groups, each small group  
113 generally had one device with which they collected data. Turns were taken within the group  
114 to deploy the device to their selected study site. Citizen scientists participating alone were  
115 allowed one or more devices as they wished. Based on the instructions given, the citizen  
116 scientists and researchers selected a study site for their device(s), which remained the same  
117 throughout the data collection period.

118 Researchers and citizen scientists recorded bat acoustic data using AudioMoth acoustic  
119 loggers (<https://www.openacousticdevices.info/audiomoth>) from 31 May–22 September 2020  
120 (active period). We pre-programmed devices to record 10 minutes at 30-minute intervals  
121 between 21:30 and 06:00, totalling 18 recordings per night. Data were collected on two  
122 nights, from Sunday evening to Tuesday morning, every two weeks. All devices initiated  
123 recording automatically at 21:30 and recorded according to the same schedule for two nights.  
124 Citizen scientists and researchers deployed the devices at their study sites prior to each data  
125 collection period and retrieved the devices from their study sites after the two-day data  
126 collection.

127 A total of 324 10-minute recordings could be collected by one device during the data  
128 collection period. Sometimes the recording failed (e.g., due to the device getting wet),  
129 resulting in missing data. Altogether, we used 121 AudioMoths in the data collection, of  
130 which 52 were used by the citizen scientists and 69 by three researchers. We did not receive  
131 location data for two devices, reducing the total number of devices used in this study to 119  
132 (Figure 1).

133 In addition, citizen scientists and researchers added the location of their study site to the  
134 Finnish Biodiversity Information Facility (FinBIF), an online data depository maintained by  
135 the Finnish Museum of Natural History, <https://laji.fi/en>, on which a separate form  
136 (Lepakkolomake, “a bat form”) had been created for this study. Citizen scientists and  
137 researchers added the following information to the bat form: a description of the habitat of  
138 the study site, environmental data (including rainfall, temperature and relative humidity)  
139 related to their study sites. We had a list of 16 habitat variables (e.g., sparse forest, lake shore,  
140 edge of shore coppice or yard), and the participants selected one or more variables that  
141 described their study site. In addition, they were asked to upload photos of the surroundings  
142 of their study site to the online form. However, because our study focuses on comparing the  
143 total activity minutes of bats recorded by citizens and researchers, we only included habitat  
144 type from the environmental data gathered in our statistical analyses.

#### 145 Data analysis methods

##### 146 *Identification of bat species using Kaleidoscope Pro*

147 Identification of bat species was conducted with Kaleidoscope Pro (Wildlife Acoustics, Inc.,  
148 v. 5.1.9). We used AutoID for bats, split the data into 15-second WAV-files and deleted noise  
149 files. The following settings were used in the analysis: signal detection parameters were set  
150 with frequency between 8 and 120 (kHz), minimum and maximum length of detected pulses  
151 1–200 (ms), minimum number of pulses 1 and the maximum inter-syllable gap of 500 (ms).  
152 To effectively locate all incidences of *E. nilssonii* and *P. nathusii* in the data set, we also  
153 searched for additional species, which are sometimes calls of our focal species incorrectly  
154 sorted by the algorithm. These additional species were *E. serotinus*, *Myotis dasycneme*,  
155 *Nyctalus leisleri*, *P. pipistrellus*, *P. kuhlii*, and *Vespertilio murinus* (see Online Appendix for  
156 more detailed description). The software saves the post-processed outputs as csv-files with

157 their associated WAV-files, which we then checked manually as misidentification by  
158 software can occur (Rydell et al. 2017).

159 We then combined the separate csv-files into one dataset and added the following  
160 information: location of the device (i.e., latitude), individual ID (i.e., who collected the data),  
161 and observer type (i.e., citizen or researcher). In addition, we classified the habitats of the  
162 study sites into three categories: 1) coastal areas and wetlands, 2) sparsely wooded areas and  
163 forests and 3) open landscape (courtyards, parks, agricultural areas). When classifying the  
164 habitats, we used descriptions and any photos of the study site provided by the participants,  
165 topographic maps, freely available aerial photographs from Finland. Finally, we calculated  
166 bat activity minutes: If any of the four 15-second files within a minute contained a focal bat  
167 species, the minute was tagged as an active minute. The sum of active minutes per site was  
168 used as the response variable.

### 169 *Statistical analyses*

170 We used a linear mixed effects model (function `glmer` in package `lme4`; Bates et al. 2015)  
171 with activity minutes (positive outcomes) of the total recording minutes (total trials) as the  
172 response variable, latitude and observer as fixed effects, and individual ID as a random effect,  
173 to test whether citizens or researchers were better at collecting acoustic data for the Northern  
174 bat. We fitted the model with a binomial distribution. Unfortunately, we had to omit enough  
175 Nathusius's pipistrelle from our analyses because we did not have enough activity data to  
176 answer our question. To determine whether environments of sites chosen by researchers and  
177 citizens differed, we conducted a Fisher's exact test. We considered a  $p$ -value  $\leq 0.05$   
178 significant for all tests. We used R v. 3.5.0 to conduct all analyses.



## 179 RESULTS

180 Citizens and researchers recorded for a total of 148,530 and 197,810 minutes, respectively.  
181 We had only one site without bat activity. Nathusius's pipistrelle were present at 31 out of  
182 119 sites and Northern bats at 118 out of 119 sites. Of the total recorded minutes, citizens and  
183 researchers recorded a total 4853 and 14276 minutes of Northern bat activity, respectively,  
184 and 40 and 603 minutes of the Nathusius's pipistrelle, respectively (Table 1). Of these 603  
185 minutes, 89.9% were from recordings of three devices (of which the best device accounted  
186 for 69.3% of all minutes) (Table 1). Citizens deployed devices across all latitudes from 60 to  
187 65 degrees N, whereas researchers deployed devices between 60 and 61degrees N (Figure 1).  
188 Northern bat activity increased with decreasing latitude ( $\beta = -0.53$ ,  $z = -20.15$ ,  $p < 0.05$ ;  
189 Figure 2A). Although there was no significant difference between researchers and citizen  
190 scientists in detecting Northern bats ( $\beta = 0.45$ ,  $z = 1.46$ ,  $p = 0.14$ ), researchers tended to place  
191 devices in locations where more Northern bat activity was recorded (Figure 2B). There was,  
192 however, a significant difference between researchers and citizens on selection of habitat type  
193 for acoustic logger deployment ( $p < 0.05$ ).

## 194 DISCUSSION

195 Citizen volunteers can help researchers by collecting large amounts of data, but the quality of  
196 the data gathered by citizen scientists remains to be determined (Wiggins et al. 2011,  
197 Kosmala et al. 2016). Our study addressed this issue by investigating the use of citizen  
198 science in studying bat activity in Finland with next-generation ultrasonic recorders.  
199 Although researchers recorded more data, we found no significant difference between citizen  
200 scientists and researchers in recorded bat activity minutes. However, we acknowledge that  
201 clustering of sampling locations at some latitudes may have affected the results in this  
202 comparison. In our case, citizen science proved an effective method: it provided data that was

203 as good as the data produced by researchers, but from a much larger geographical area. In a  
204 similar way, citizen science has produced reliable information on the distribution of birds  
205 (Fournier et al. 2017, Biddle et al. 2021). Structured citizen science projects often bring  
206 together large numbers of people at the same time in the same place, which reduces their  
207 spatio-temporal coverage, compared to, for example, crowdsourcing-type research (Welvaert  
208 and Caley 2016). Our project, however, differs from this in that we collaborated with high  
209 schools remotely thereby increasing our regional coverage.

210 Our study focused on two species of bats with differing population trajectories: the  
211 Nathusius's pipistrelle and the Northern bat. The former is a species that is rapidly expanding  
212 its range to the north in Europe (Lundy et al. 2010, Blomberg et al. 2020), whereas the latter,  
213 although still abundant, has shown a sharp decline in population size (Rydell et al. 2020).  
214 However, both of the species have rather broad habitat preferences (Tidenberg et al. 2019),  
215 and had we chosen to focus on species with more specific habitat requirements, we may have  
216 seen differences between the two groups of observers in collected bat activity due to  
217 placement of the recorders. Our study suggests that citizen science also has potential in  
218 studying the occurrence of a species with insufficient data especially by covering a broader  
219 geographical area than researchers alone. With the help of citizen scientists, we produced  
220 valuable occurrence information for the Nathusius's pipistrelle, with the current northernmost  
221 observation in Finland in the Oulu region (c. 65° north) recorded by participating students.  
222 Other citizen science projects have produced new information in a similar way, for instance,  
223 on the distribution of rare fish species (Naasan Aga Spyridopoulou et al. 2020, Tiralongo et  
224 al. 2020), insects (Zapponi et al. 2017, Soroye et al. 2018, Wilson et al. 2020) and large  
225 carnivores in remote areas (Farhadinia et al. 2018).

226 There are still unanswered questions on the reliability of data collected by non-professionals  
227 that need to be accounted for when implementing citizen science projects. Citizen science

228 may be subject to biases depending on the sampling design (Geldmann et al. 2016, Brown  
229 and Williams 2019) or through interpretations made by citizens themselves (Galloway et al.  
230 2006), which has been noted, for instance, in the over-reporting of rare species (Galloway et  
231 al. 2006, Gardiner et al. 2012). Acoustic monitoring does not require interpretation (or  
232 identification of the species) from participants, making it less susceptible to such bias, which  
233 also supports its use in bat-orientated citizen science projects.

234 Another potential source of bias is the choice of study sites (Dambly et al. 2021), which  
235 necessitates the need for standardization of data collection. We provided detailed instructions  
236 for site selection and data collection to maintain consistency across all participants. We also  
237 pre-programmed the entire recording schedule on the devices to ensure ease of data collection  
238 for the participants as well as simultaneous data collection at all study sites. Training of the  
239 participants, which is common in structured citizen science projects, was carried out in our  
240 project with the help of biology and geography teachers both having a core understanding of  
241 ecological principles. This, together with the commitment and active involvement of the  
242 participants, enables the production of high-quality data for the use of researchers (Welvaert  
243 and Caley 2016). Consequently, potential uncertainties associated with the use of citizen  
244 science (e.g. Kosmala et al. 2016, Steger et al. 2017, Brown and Williams 2019), can be  
245 mitigated through means of careful planning of the study (Kosmala et al. 2016) and designing  
246 the research protocol from the perspective of citizen scientist involvement (Cohn 2008).  
247 Nevertheless, we recommend that projects using citizen science carefully consider  
248 appropriate study design and methods of data collection and invest in instructing the  
249 participants.

250 In addition to enabling the collection of data that would not be otherwise possible (Chandler  
251 et al. 2017), the benefits of citizen science extend beyond science. For example, citizen  
252 science enables a bidirectional information flow between researchers and the public, and

253 increases scientific and environmental literacy among the participants (Trumbull et al. 2000,  
254 McKinley et al. 2017). Furthermore, collecting environmental data has also been found to  
255 foster engagement in environmental conservation actions among volunteers, increasing  
256 community interaction and interest toward conservation (Ballard et al. 2017). The possibility  
257 of being actively in contact with nature cannot be underestimated in modern urbanised  
258 societies. Engagement in nature activities and positive nature experiences are associated with  
259 higher felt connection with nature, willingness to take care of nature, and even with higher  
260 personal subjective well-being and happiness (Zelenski and Nisbet 2014, Martin et al. 2020,  
261 Cleary et al. 2020).

262 For schools citizen science provides an opportunity for students to learn more about science  
263 (Trumbull et al. 2000) and learning outside the classroom (Hulbert 2016). As a part of this  
264 project, we designed a customized science course on bats for the high schools that  
265 participated in our project including all stages of scientific research. The participants of the  
266 course had the opportunity to analyse the data they collected using a free version of  
267 Kaleidoscope or Audacity software to manually identify the bats according to the tutorial we  
268 had prepared for them. These data were not used in our analyses. The purpose of this course  
269 was to increase the understanding of the scientific process through practical assignments. At  
270 the end of the course, we held an online lecture that summarized the results of the project. We  
271 also shared information about bats through the project's Instagram account, along with  
272 additional instructions.

273 Currently, citizen science is included in only a small proportion of academic research  
274 publications (Callaghan et al. 2021). One of the main barriers for use of citizen science has  
275 been the question on data quality. The findings of this study indicate that volunteers can  
276 collect high quality data using novel digital innovations, when given good instructions.  
277 Another barrier is the lack of legitimacy of citizen science in scientific communities (Burgess

278 et al. 2017, Golumbic et al. 2017). Therefore, more research focusing on the quality of data  
279 gathered by citizen scientists is needed to make greater use of the potential of citizen science  
280 in scientific research.

## 281 CONCLUSIONS

282 Citizen science provides numerous invaluable opportunities in understanding the effects of  
283 e.g., biodiversity loss and climate change through environmental monitoring, thus stressing  
284 the need to enhance the use of citizen science in research. However, careful consideration  
285 should be given to study design and to the instructions provided to citizen scientists to ensure  
286 the quality of the data. The main advantage of citizen science to the field of research is the  
287 broad geographical coverage, which could not be achieved by researchers alone due to  
288 schedule and budgetary reasons. Another advantage is the wide range of habitats covered by  
289 citizen scientists. Citizen science can also be useful in studying the occurrence of rare  
290 species. Furthermore, citizen science projects have additional benefits, such as increasing the  
291 knowledge of the participants, and interest in nature and natural sciences.

## 292 ACKNOWLEDGEMENTS

293 We thank our citizen science project participants for their help in data collection, without  
294 whom this study would not have been possible, as well as the Kone Foundation for funding  
295 this project (Funding ID: 201802425, Natural Resources Institute Finland (Luke) Project nr:  
296 41007-00165400). We thank Lasse Ruokolainen for his advice in statistical analysis and  
297 Janne Lundberg for his help with pre-programming the AudioMoth devices for the data  
298 collection. We also thank Finnish Museum of Natural History ICT-team and CSC – IT Centre  
299 for Science for assistance in data handling.

## 300 CONFLICT OF INTEREST

301 None declared.

302 LITERATURE CITED

- 303 Ancillotto, L., L. Santini, N. Ranc, L. Maiorano, and D. Russo. 2016. Extraordinary range  
304 expansion in a common bat: the potential roles of climate change and urbanisation.  
305 The Science of Nature 103:15.
- 306 Ballard, H. L., C. G. H. Dixon, and E. M. Harris. 2017. Youth-focused citizen science:  
307 Examining the role of environmental science learning and agency for conservation.  
308 Biological Conservation 208:65–75.
- 309 Bates, D., M. Mächler, B. Bolker, and S. Walker. 2015. Fitting linear mixed-effects models  
310 using **lme4**. Journal of Statistical Software 67.
- 311 Bellard, C., C. Bertelsmeier, P. Leadley, W. Thuiller, and F. Courchamp. 2012. Impacts of  
312 climate change on the future of biodiversity. Ecology Letters 15:365–377.
- 313 Biddle, R., I. Solis-Ponce, M. Jones, S. Marsden, M. Pilgrim, and C. Devenish. 2021. The  
314 value of local community knowledge in species distribution modelling for a  
315 threatened Neotropical parrot. Biodiversity and Conservation 30:1803–1823.
- 316 Blomberg, A. S., V. Vasko, S. Salonen, G. Pētersons, and T. M. Lilley. 2020. First record of  
317 a Nathusius' pipistrelle (*Pipistrellus nathusii*) overwintering at a latitude above 60°N.  
318 Mammalia 1.
- 319 Boyles, J. G., P. M. Cryan, G. F. McCracken, and T. H. Kunz. 2011. Economic importance of  
320 bats in agriculture. Science 332:41–42.
- 321 Brown, E. D., and B. K. Williams. 2019. The potential for citizen science to produce reliable  
322 and useful information in ecology.
- 323 Burgess, H. K., L. B. DeBey, H. E. Froehlich, N. Schmidt, E. J. Theobald, A. K. Ettinger, J.  
324 HilleRisLambers, J. Tewksbury, and J. K. Parrish. 2017. The science of citizen

- 325 science: Exploring barriers to use as a primary research tool. *Biological Conservation*  
326 208:113–120.
- 327 Callaghan, C. T., A. G. B. Poore, T. Mesaglio, A. T. Moles, S. Nakagawa, C. Roberts, J. J. L.  
328 Rowley, A. Vergés, J. H. Wilshire, and W. K. Cornwell. 2021. Three frontiers for the  
329 future of biodiversity research using citizen science data. *BioScience* 71:55–63.
- 330 Ceballos, G., P. R. Ehrlich, A. D. Barnosky, A. García, R. M. Pringle, and T. M. Palmer.  
331 2015. Accelerated modern human-induced species losses: Entering the sixth mass  
332 extinction. *Science Advances* 1:e1400253.
- 333 Chandler, M., L. See, K. Copas, A. M. Z. Bonde, B. C. López, F. Danielsen, J. K. Legind, S.  
334 Masinde, A. J. Miller-Rushing, G. Newman, A. Rosemartin, and E. Turak. 2017.  
335 Contribution of citizen science towards international biodiversity monitoring.  
336 *Biological Conservation* 213:280–294.
- 337 Cleary, A., K. S. Fielding, Z. Murray, and A. Roiko. 2020. Predictors of nature connection  
338 among urban residents: assessing the role of childhood and adult nature experiences.  
339 *Environment and Behavior* 52:579–610.
- 340 Cohn, J. P. 2008. Citizen Science: Can Volunteers Do Real Research? *BioScience* 58:192–  
341 197.
- 342 Conrad, C. C., and K. G. Hilchey. 2011. A review of citizen science and community-based  
343 environmental monitoring: issues and opportunities. *Environmental Monitoring and*  
344 *Assessment* 176:273–291.
- 345 Dambly, L. I., K. E. Jones, K. L. Boughey, and N. J. B. Isaac. 2021. Observer retention, site  
346 selection and population dynamics interact to bias abundance trends in bats. *Journal*  
347 *of Applied Ecology* 58:236–247.

- 348 Devictor, V., R. J. Whittaker, and C. Beltrame. 2010. Beyond scarcity: citizen science  
349 programmes as useful tools for conservation biogeography. *Diversity and*  
350 *Distributions* 16:354–362.
- 351 Farhadinia, M. S., R. J. Moll, R. A. Montgomery, S. Ashrafi, P. J. Johnson, L. T. B. Hunter,  
352 and D. W. Macdonald. 2018. Citizen science data facilitate monitoring of rare large  
353 carnivores in remote montane landscapes. *Ecological Indicators* 94:283–291.
- 354 Flaquer, C., I. Torre, and A. Arrizabalaga. 2007. Comparison of sampling methods for  
355 inventory of bat communities. *Journal of Mammalogy* 88:526–533.
- 356 Fournier, A. M. V., K. L. Drake, and D. C. Tozer. 2017. Using citizen science monitoring  
357 data in species distribution models to inform isotopic assignment of migratory  
358 connectivity in wetland birds. *Journal of Avian Biology* 48:1556–1562.
- 359 Frick, W. F., J. F. Pollock, A. C. Hicks, K. E. Langwig, D. S. Reynolds, G. G. Turner, C. M.  
360 Butchkoski, and T. H. Kunz. 2010. An emerging disease causes regional population  
361 collapse of a common North American bat species. *Science* 329:679–682.
- 362 Galloway, A. W. E., M. T. Tudor, and W. M. V. Haegen. 2006. The reliability of citizen  
363 science: a case study of Oregon white oak stand surveys. *Wildlife Society Bulletin*  
364 34:1425–1429.
- 365 Gardiner, M. M., L. L. Allee, P. M. Brown, J. E. Losey, H. E. Roy, and R. R. Smyth. 2012.  
366 Lessons from lady beetles: accuracy of monitoring data from US and UK citizen-  
367 science programs. *Frontiers in Ecology and the Environment* 10:471–476.
- 368 Gaultier, S., A. S. Blomberg, A. Ijäs, V. Vasko, E. J. Vesterinen, J. Brommer, and T. M.  
369 Lilley. 2020. Bats and wind farms: the role and importance of the Baltic Sea countries  
370 in the European context of power transition and biodiversity conservation.  
371 *Environmental Science & Technology Manuscript*.



- 372 Geldmann, J., J. Heilmann-Clausen, T. E. Holm, I. Levinsky, B. Markussen, K. Olsen, C.  
373 Rahbek, and A. P. Tøttrup. 2016. What determines spatial bias in citizen science?  
374 Exploring four recording schemes with different proficiency requirements. *Diversity*  
375 and *Distributions* 22:1139–1149.
- 376 Golumbic, Y. N., D. Orr, A. Baram-Tsabari, and B. Fishbain. 2017. Between vision and  
377 reality: a study of scientists' views on citizen science. *Citizen Science: Theory and*  
378 *Practice* 2:6.
- 379 Heigl, F., B. Kieslinger, K. T. Paul, J. Uhlik, and D. Dörler. 2019. Opinion: Toward an  
380 international definition of citizen science. *Proceedings of the National Academy of*  
381 *Sciences* 116:8089–8092.
- 382 Hill, A. P., P. Prince, E. P. Covarrubias, C. P. Doncaster, J. L. Snaddon, and A. Rogers. 2018.  
383 AudioMoth: Evaluation of a smart open acoustic device for monitoring biodiversity  
384 and the environment. *Methods in Ecology and Evolution* 9:1199–1211.
- 385 Hulbert, J. M. 2016. Citizen science tools available for ecological research in South Africa.  
386 *South African Journal of Science* 112:1–2.
- 387 Ijäs, A., A. Kahilainen, V. V. Vasko, and T. M. Lilley. 2017. Evidence of the migratory bat,  
388 *Pipistrellus nathusii*, aggregating to the coastlines in the northern Baltic Sea. *Acta*  
389 *Chiropterologica* 19:127–139.
- 390 Kasso, M., and M. Balakrishnan. 2013, November 10. Ecological and economic importance  
391 of bats (order Chiroptera). Review Article, Hindawi.  
392 <https://www.hindawi.com/journals/isrn/2013/187415/>.
- 393 Kosmala, M., A. Wiggins, A. Swanson, and B. Simmons. 2016. Assessing data quality in  
394 citizen science. *Frontiers in Ecology and the Environment* 14:551–560.

- 395 Lundy, M., I. Montgomery, and J. Russ. 2010. Climate change-linked range expansion of  
396 Nathusius' pipistrelle bat, *Pipistrellus nathusii* (Keyserling & Blasius, 1839). Journal  
397 of Biogeography 37:2232–2242.
- 398 Martin, L., M. P. White, A. Hunt, M. Richardson, S. Pahl, and J. Burt. 2020. Nature contact,  
399 nature connectedness and associations with health, wellbeing and pro-environmental  
400 behaviours. Journal of Environmental Psychology 68:101389.
- 401 McKinley, D. C., A. J. Miller-Rushing, H. L. Ballard, R. Bonney, H. Brown, S. C. Cook-  
402 Patton, D. M. Evans, R. A. French, J. K. Parrish, T. B. Phillips, S. F. Ryan, L. A.  
403 Shanley, J. L. Shirk, K. F. Stepenuck, J. F. Weltzin, A. Wiggins, O. D. Boyle, R. D.  
404 Briggs, S. F. Chapin, D. A. Hewitt, P. W. Preuss, and M. A. Soukup. 2017. Citizen  
405 science can improve conservation science, natural resource management, and  
406 environmental protection. Biological Conservation 208:15–28.
- 407 Naasan Aga Spyridopoulou, R., J. Langeneck, D. Bouziotis, I. Giovos, P. Kleitou, and S.  
408 Kalogirou. 2020. Filling the Gap of Data-Limited Fish Species in the Eastern  
409 Mediterranean Sea: A Contribution by Citizen Science. Journal of Marine Science  
410 and Engineering 8:107.
- 411 Roche, N., S. Langton, T. Aughney, J. M. Russ, F. Marnell, D. Lynn, and C. Catto. 2011. A  
412 car-based monitoring method reveals new information on bat populations and  
413 distributions in Ireland. Animal Conservation 14:642–651.
- 414 Rydell, J., M. Elfström, J. Eklöf, and S. Sánchez-Navarro. 2020. Dramatic decline of northern  
415 bat *Eptesicus nilssonii* in Sweden over 30 years. Royal Society Open Science  
416 7:191754.

- 417 Rydell, J., S. Nyman, J. Eklöf, G. Jones, and D. Russo. 2017. Testing the performances of  
418 automated identification of bat echolocation calls: A request for prudence. *Ecological*  
419 *Indicators* 78:416–420.
- 420 Soroye, P., N. Ahmed, and J. T. Kerr. 2018. Opportunistic citizen science data transform  
421 understanding of species distributions, phenology, and diversity gradients for global  
422 change research. *Global Change Biology* 24:5281–5291.
- 423 Steger, C., B. Butt, and M. B. Hooten. 2017. Safari Science: assessing the reliability of  
424 citizen science data for wildlife surveys. *Journal of Applied Ecology* 54:2053–2062.
- 425 Tidenberg, E.-M., U.-M. Liukko, and T. Stjernberg. 2019. Atlas of Finnish bats. *Annales*  
426 *Zoologici Fennici* 56:207–250.
- 427 Tiralongo, F., F. Crocetta, E. Riginella, A. O. Lillo, E. Tondo, A. Macali, E. Mancini, F.  
428 Russo, S. Coco, G. Paolillo, and E. Azzurro. 2020. Snapshot of rare, exotic and  
429 overlooked fish species in the Italian seas: A citizen science survey. *Journal of Sea*  
430 *Research* 164:101930.
- 431 Trumbull, D. J., R. Bonney, D. Bascom, and A. Cabral. 2000. Thinking scientifically during  
432 participation in a citizen-science project. *Science Education* 84:265–275.
- 433 Welvaert, M., and P. Caley. 2016. Citizen surveillance for environmental monitoring:  
434 combining the efforts of citizen science and crowdsourcing in a quantitative data  
435 framework. SpringerPlus 5.
- 436 Wiggins, A., G. Newman, R. Stevenson, and K. Crowston. 2011. Mechanisms for data  
437 quality and validation in citizen science. 2011 IEEE Seventh International Conference  
438 on e-Science Workshops, Stockholm, p. 14-19.
- 439 Wilson, J. S., A. D. Pan, D. E. M. General, and J. B. Koch. 2020. More eyes on the prize: an  
440 observation of a very rare, threatened species of Philippine Bumble bee, *Bombus*

441 *irisanensis*, on iNaturalist and the importance of citizen science in conservation  
442 biology. *Journal of Insect Conservation* 24:727–729.

443 Zapponi, L., A. Cini, M. Bardiani, S. Hardersen, M. Maura, E. Maurizi, L. Redolfi De Zan, P.  
444 Audisio, M. A. Bologna, G. M. Carpaneto, P. F. Roversi, G. Sabbatini Peverieri, F.  
445 Mason, and A. Campanaro. 2017. Citizen science data as an efficient tool for mapping  
446 protected saproxylic beetles. *Biological Conservation* 208:139–145.

447 Zelenski, J. M., and E. K. Nisbet. 2014. Happiness and Feeling Connected: The Distinct Role  
448 of Nature Relatedness. *Environment and Behavior* 46:3–23.

#### 449 TABLES

450 Table 1. Total recording time and total bat activity for the northern bat (*E. nilssonii*) and  
451 Nathusius's pipistrelle (*P. nathusii*) across latitudes monitored by observer type (citizen or  
452 researcher).  
453 researcher).

|         | Total Recording<br>Minutes | Total northern bat<br>Activity Minutes | Total Nathusius'<br>pipistrelle Activity<br>Minutes | Total<br>devices |
|---------|----------------------------|----------------------------------------|-----------------------------------------------------|------------------|
| Citizen | 4893                       | 4853                                   | 40                                                  | 50               |
| 60°     | 3057                       | 3029                                   | 28                                                  | 18               |
| 61°     | 1223                       | 1212                                   | 11                                                  | 15               |
| 62°     | 411                        | 411                                    | 0                                                   | 4                |
| 63°     | 109                        | 109                                    | 0                                                   | 2                |
| 64°     | 4                          | 4                                      | 0                                                   | 1                |

|            |       |       |     |    |
|------------|-------|-------|-----|----|
| 65°        | 89    | 88    | 1   | 10 |
| Researcher | 14879 | 14276 | 603 | 69 |
| 60°        | 12473 | 11874 | 599 | 55 |
| 61°        | 2406  | 2402  | 4   | 14 |

---

454

455

456 FIGURE CAPTIONS

457 Figure 1. Map of the distribution of deployed AudioMoths (n = 119) across Finland by  
458 citizens (circle, n = 50) and researchers (triangle; n = 69).

459 Figure 2. Northern bat (*E. nilssonii*) activity recorded across latitudes (A) and based on total  
460 recording minutes (B). Gray region represents the 95% confidence level interval for  
461 predictions from a linear model.

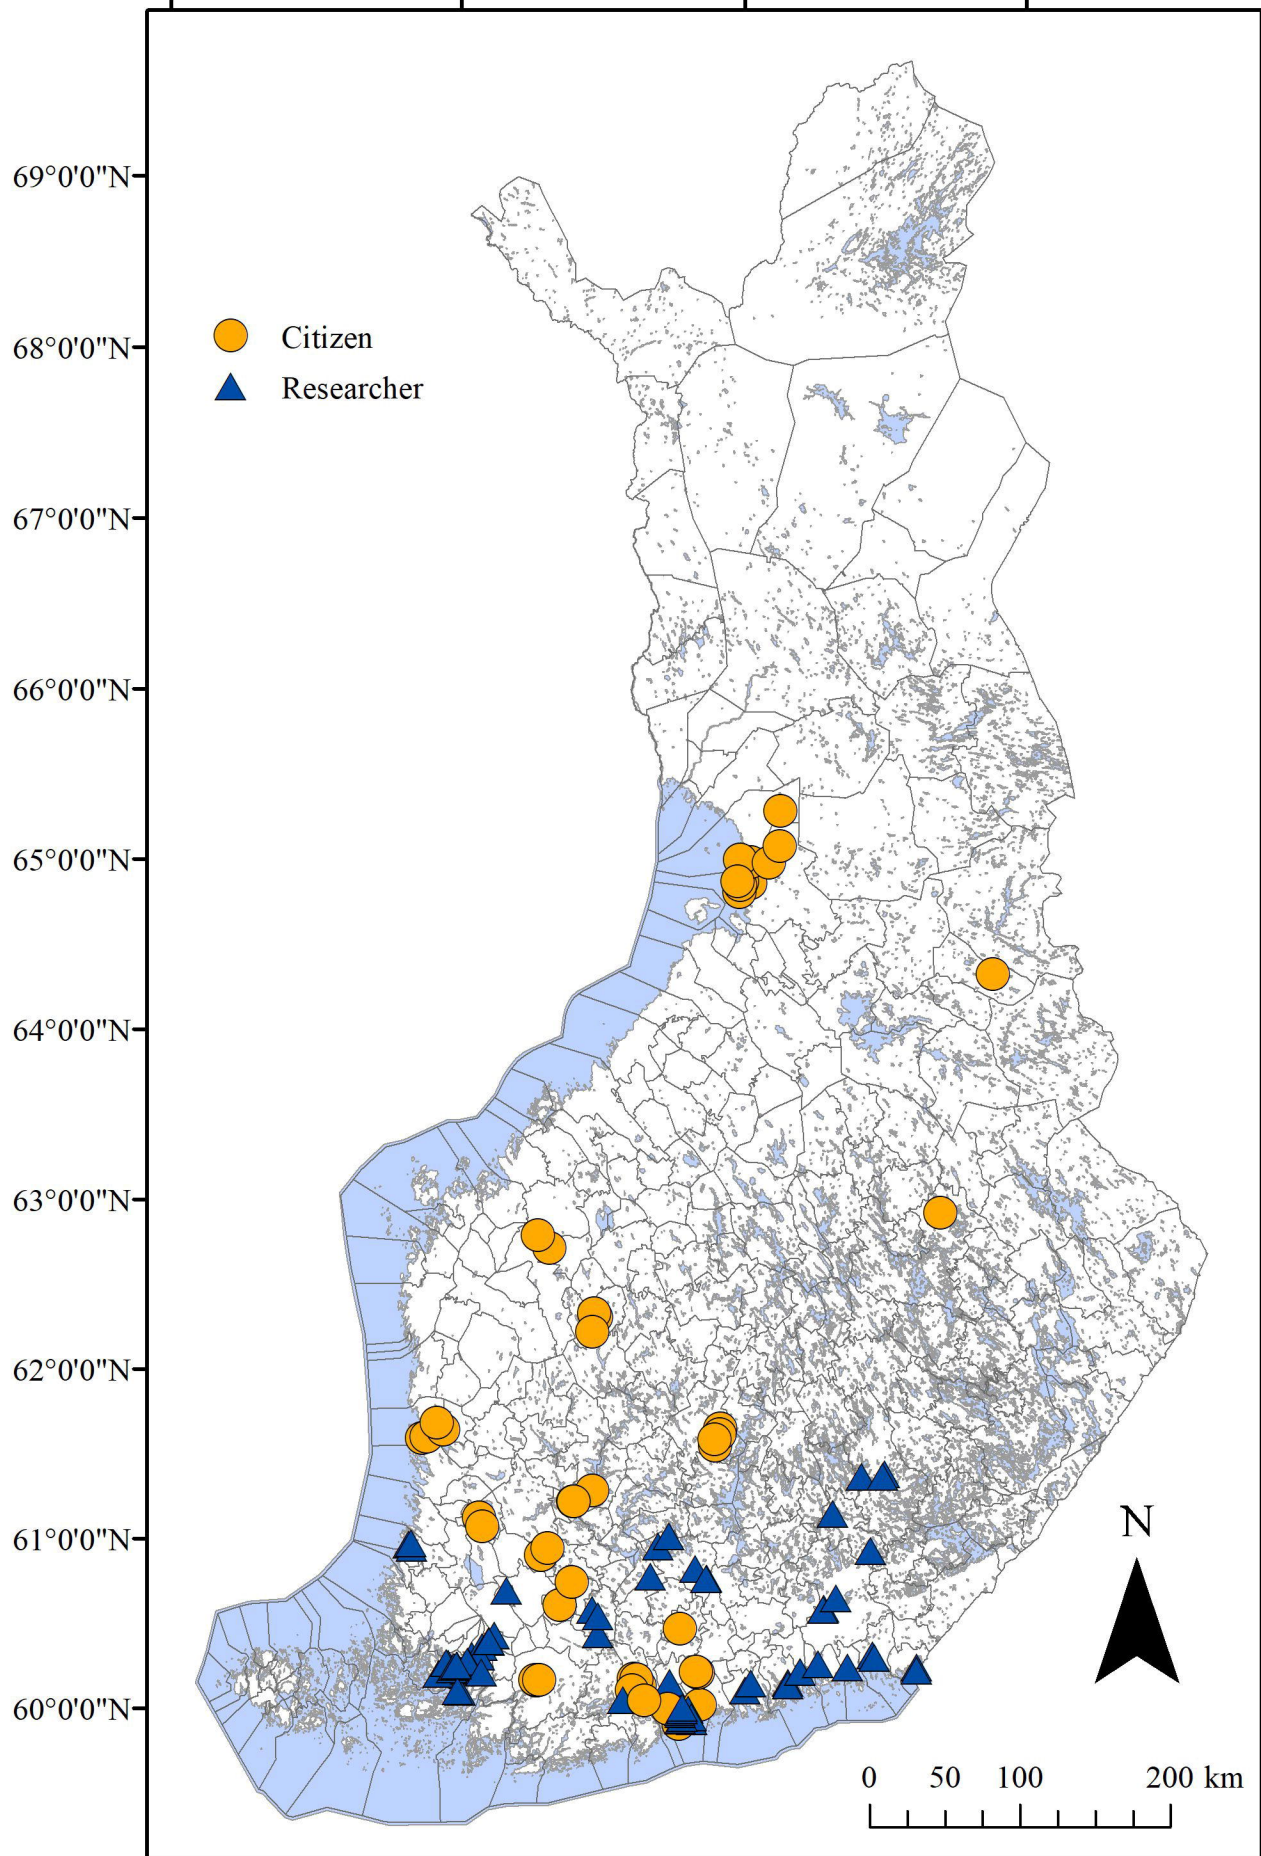

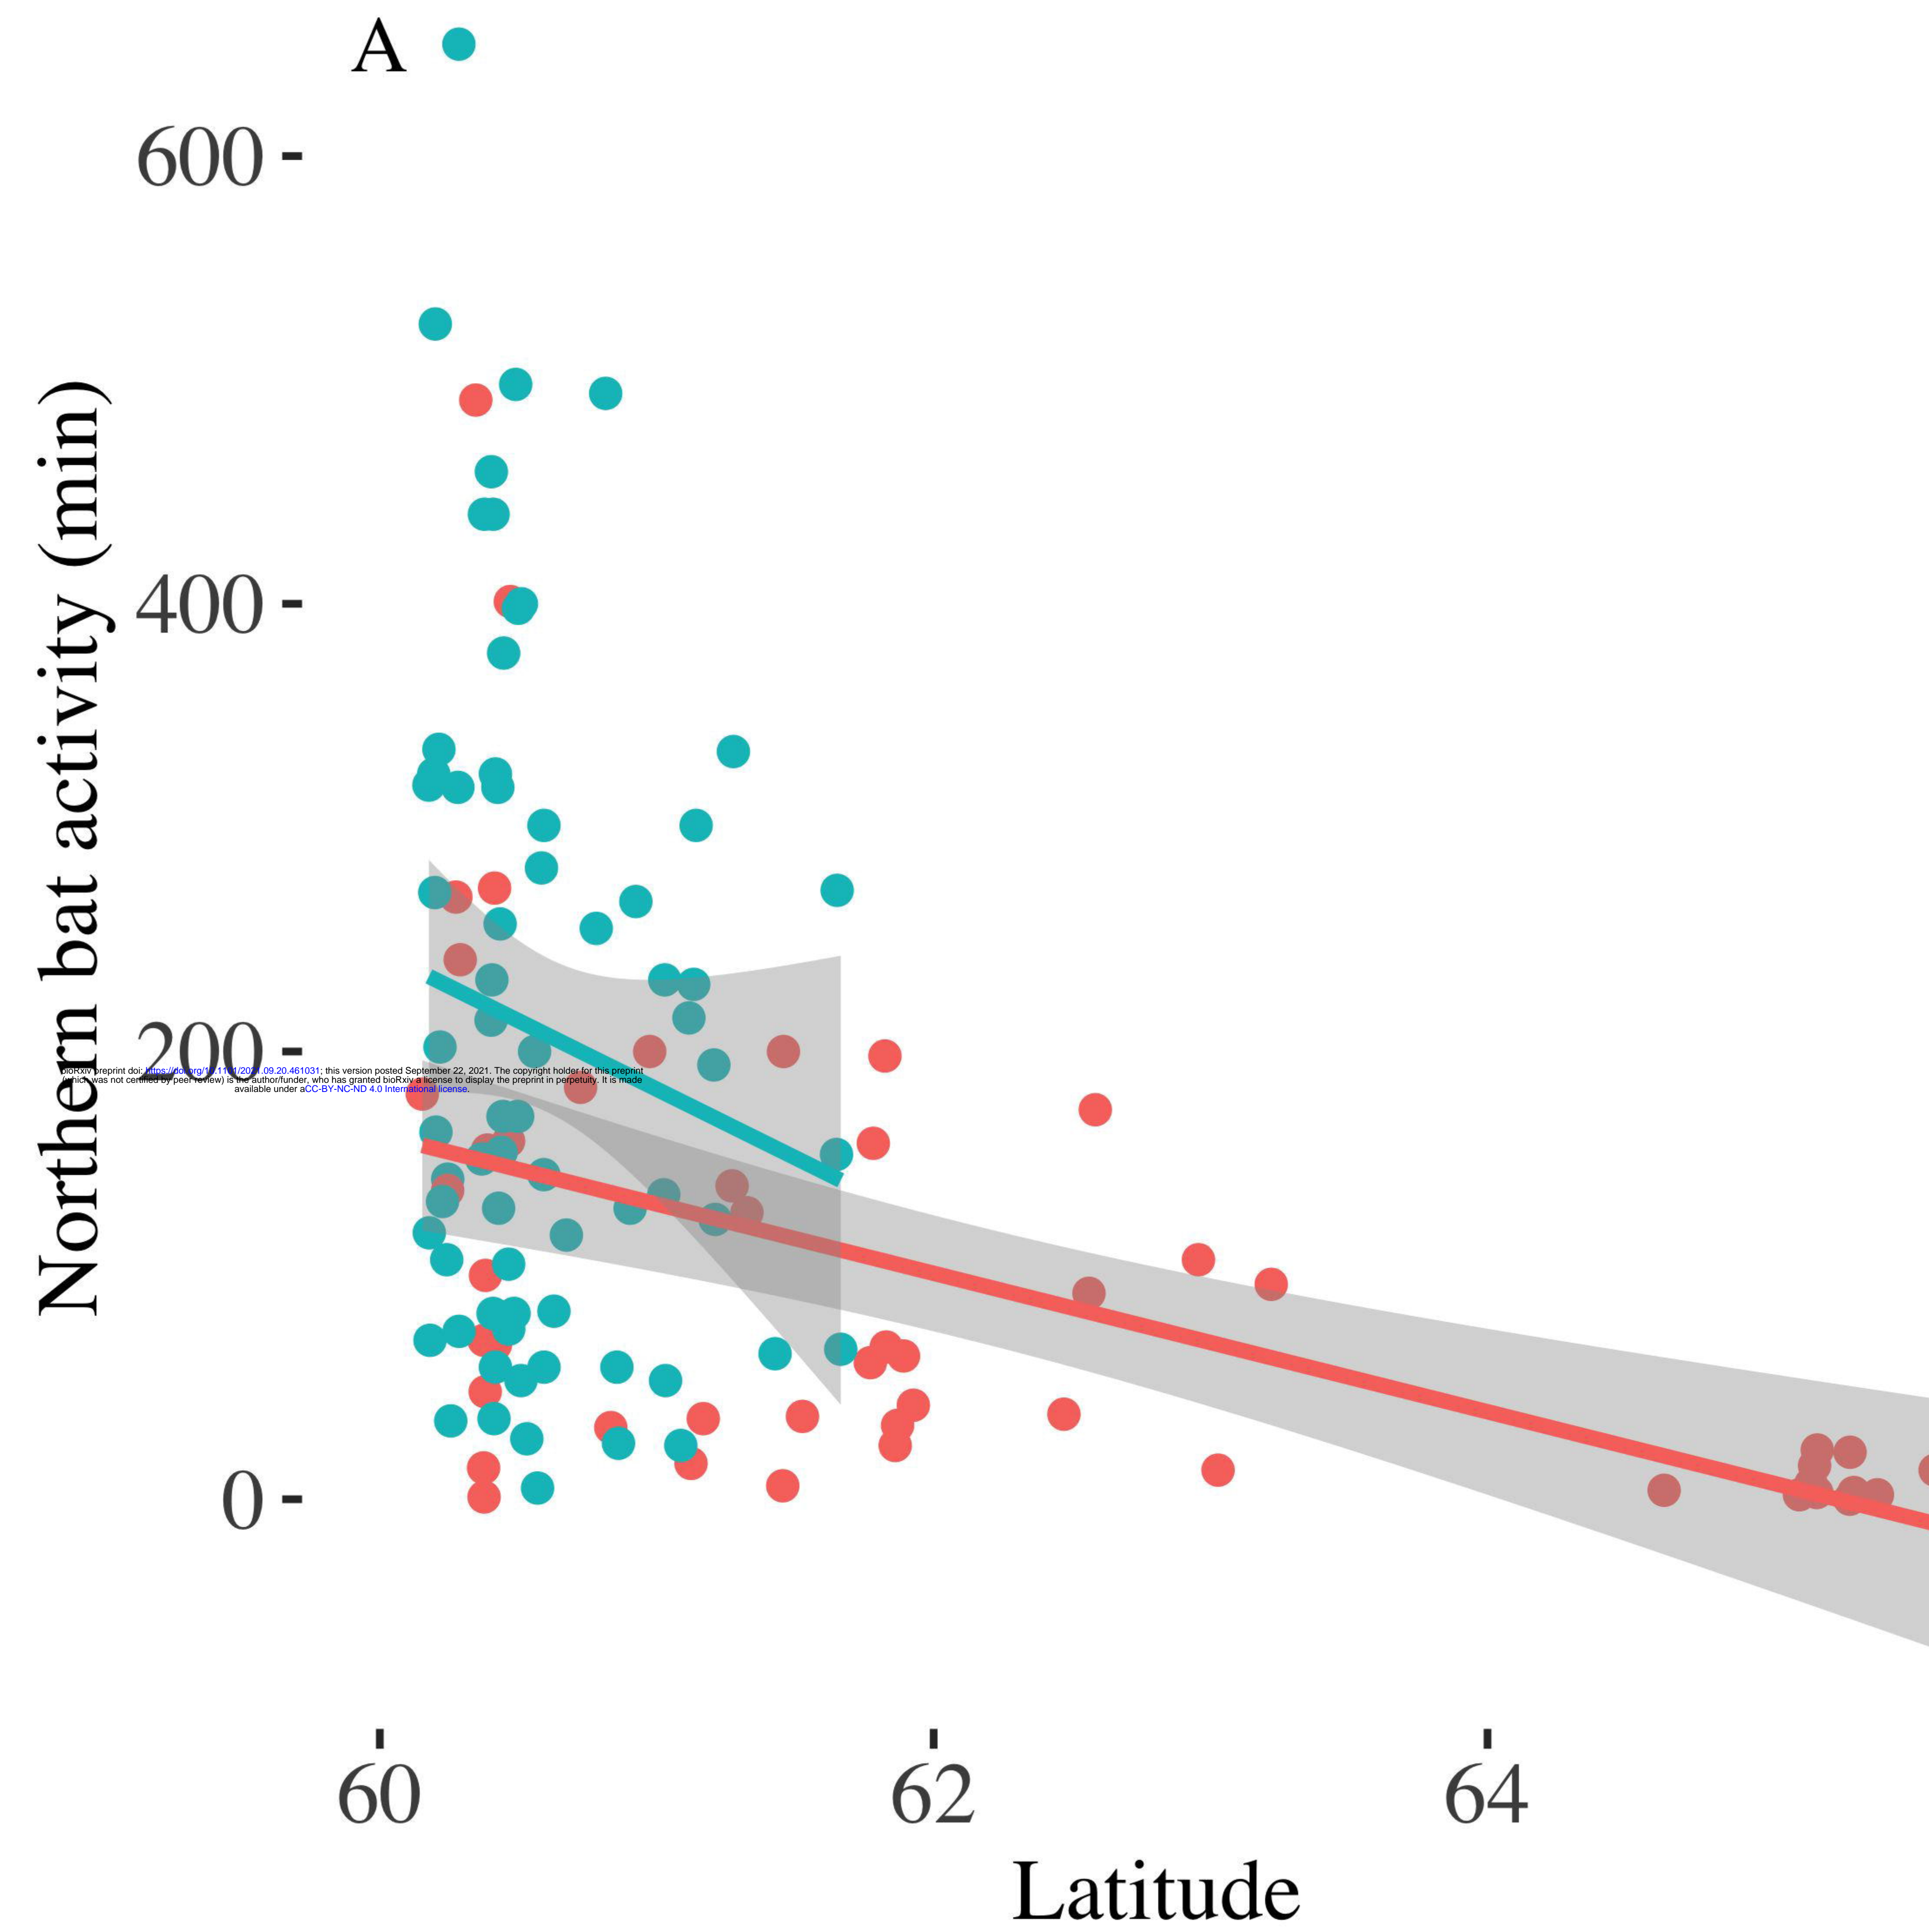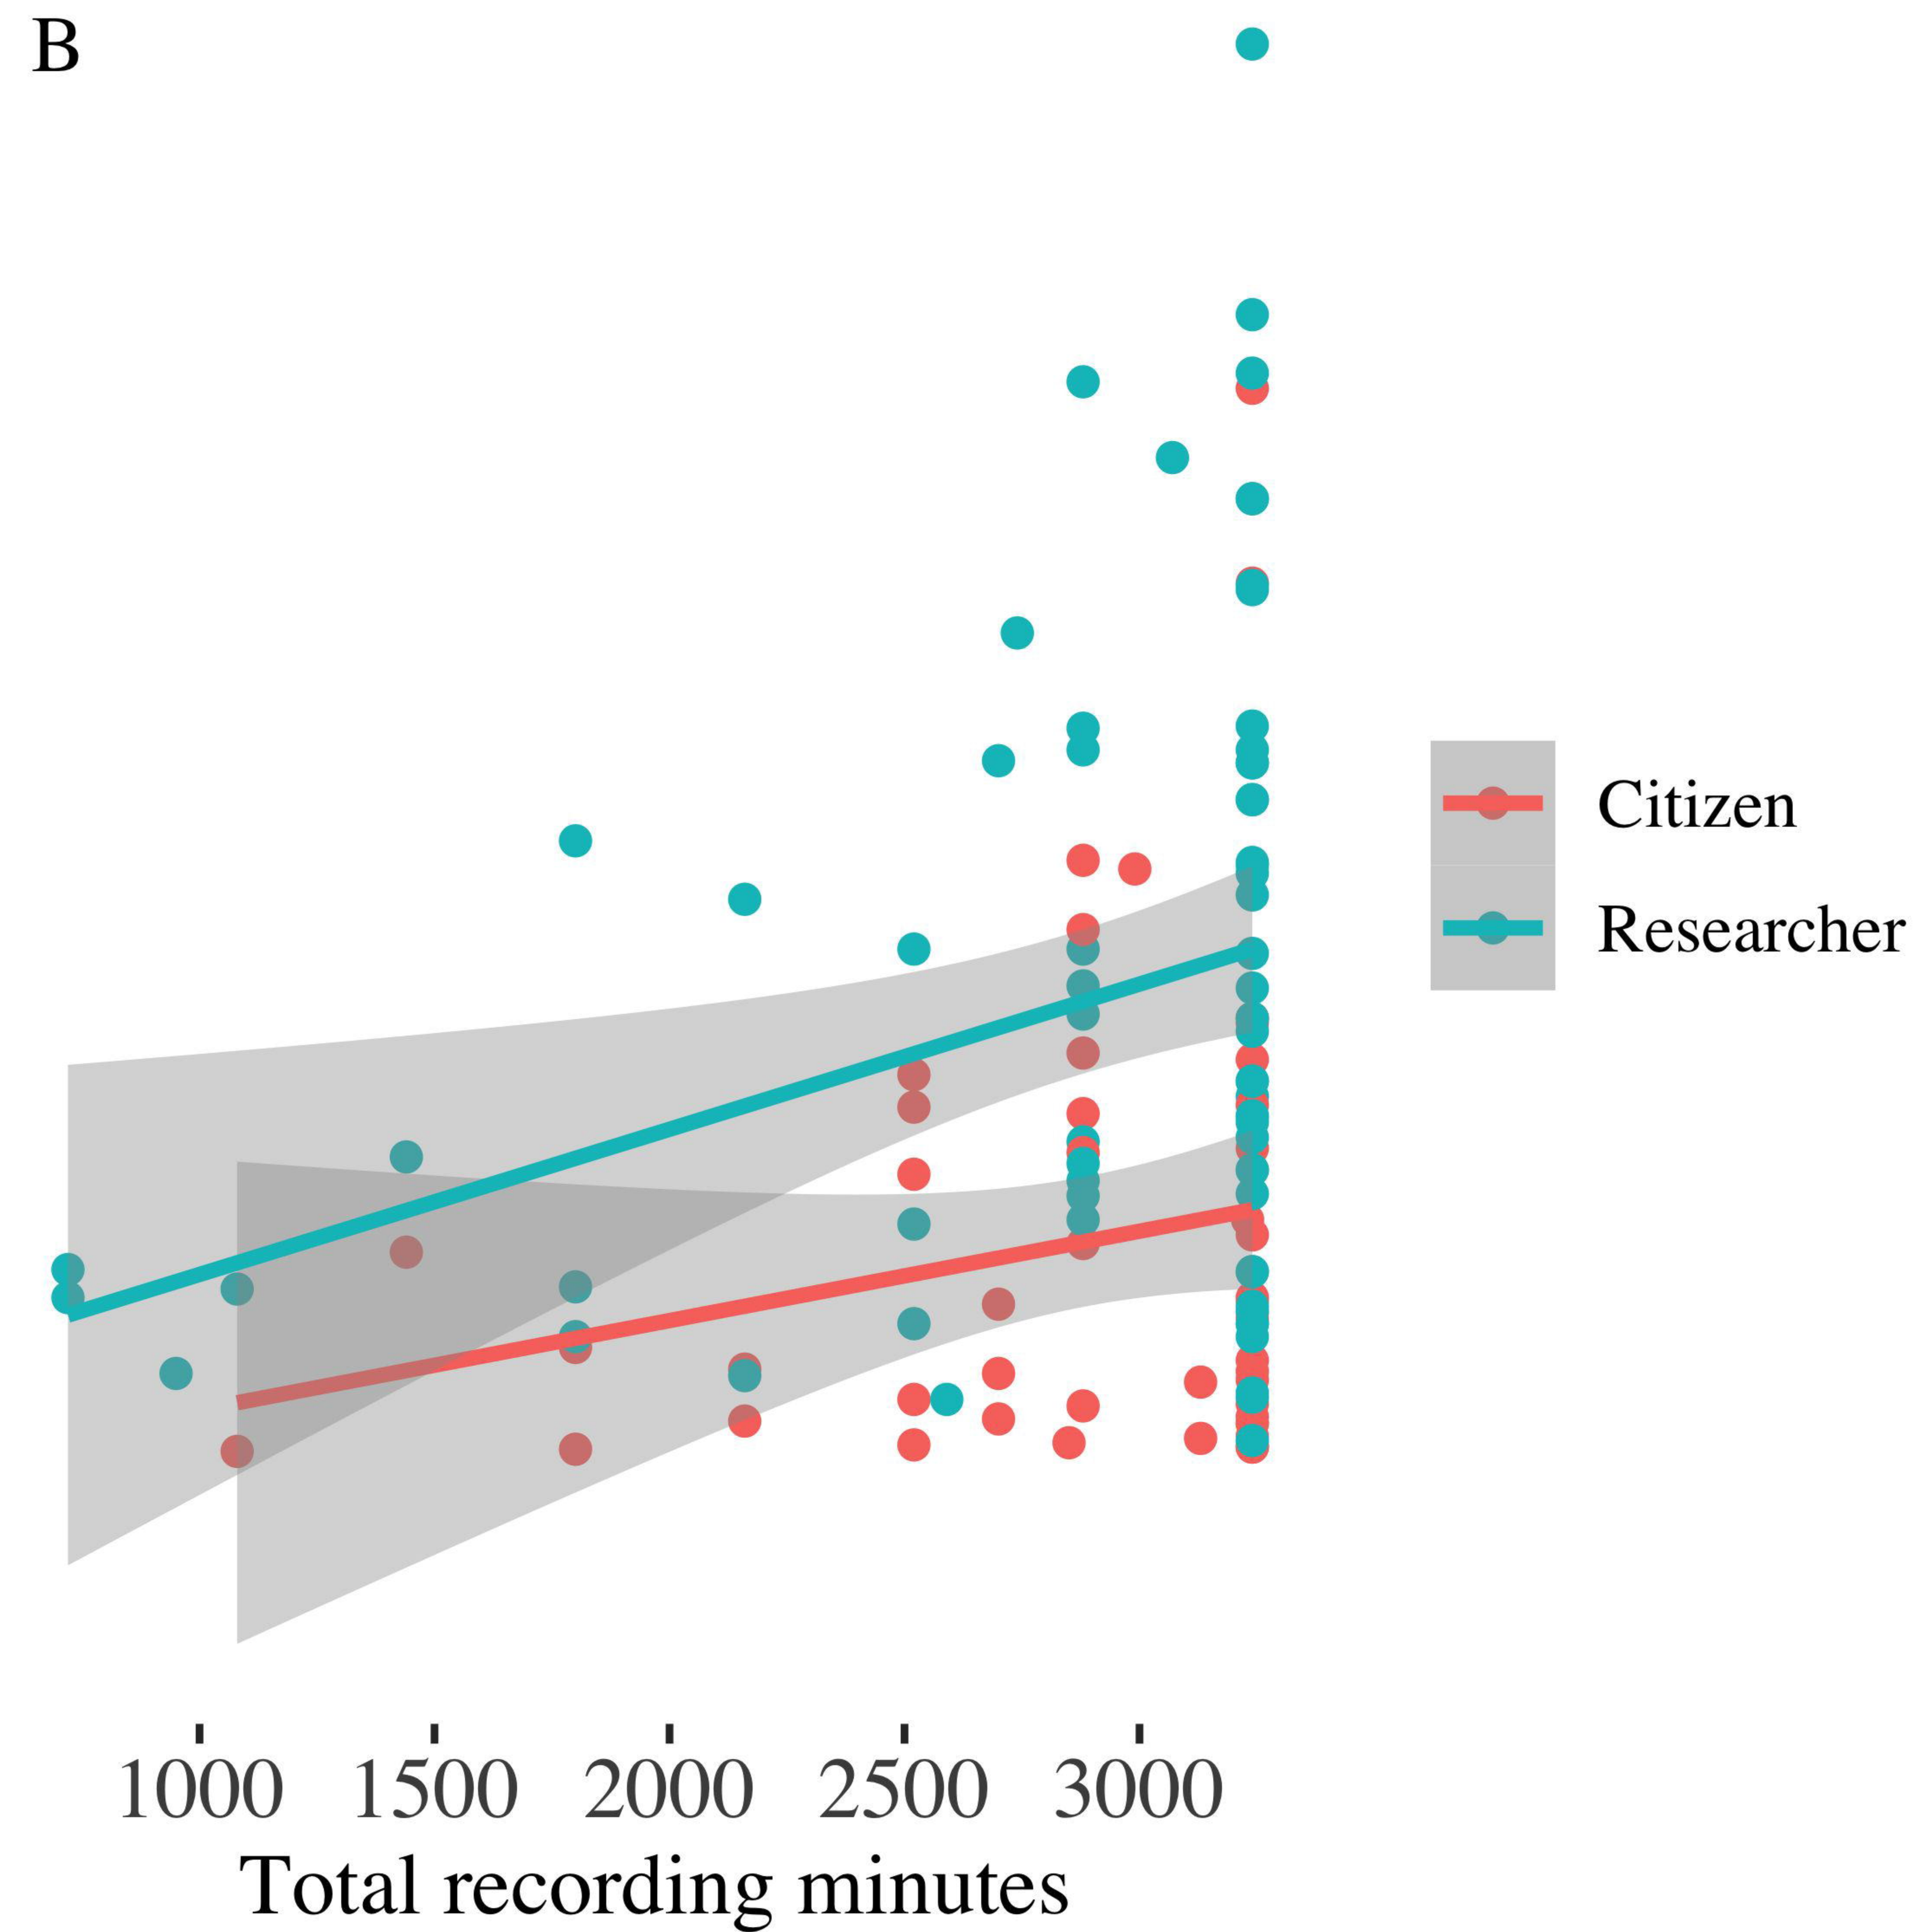

Source: https://www.biorxiv.org/content/10.1101/2021.09.20.461031v1.full.pdf
